# Supplementary material
Source: PubMed Central journal article supplement (PMC2820131)
Supplement: NIHMS173456-supplement-Supplemental_Tables.pdf [file NIHMS173456-supplement-Supplemental_Tables.pdf]

**Table S1**  
**DAPK1 Protein Complex Identified by NLC/MS**

| Reference<br>Scan(s)                                                           | Peptide             | MH+        | Score |       |
|--------------------------------------------------------------------------------|---------------------|------------|-------|-------|
|                                                                                |                     |            | XC    | Delta |
| <b>K2C1 Keratin, type II cytoskeletal 1 (Cytokeratin-1) (CK-1) (Keratin-1)</b> |                     |            |       |       |
| 2190                                                                           | -.AEAESLYQSK.-      | 1125.54000 | 3.13  | 0.50  |
| 2604                                                                           | -.QISNLQQSISDAEQR.  | 1716.85000 | 4.41  | 0.53  |
| 2188                                                                           | -.SDQSRLDSELK.-     | 1277.63000 | 2.71  | 0.23  |
| <b>DAPK1_MOUSE Death-Associated Protein Kinase 1 (DAP kinase 1)</b>            |                     |            |       |       |
| 2207                                                                           | -.AEQHEHVAGLLAR.-   | 1430.75000 | 3.93  | 0.39  |
| 2104                                                                           | -.DKSGETALHVAAR.-   | 1354.71000 | 2.70  | 0.33  |
| 2813                                                                           | -.GLFIQQLRPTQNLPQR. | 1909.08000 | 3.31  | 0.44  |
| 2236                                                                           | -.HYLSPQQLR.-       | 1141.61000 | 2.24  | 0.13  |
| 1893                                                                           | -.RGVSRDIER.-       | 1216.64000 | 3.19  | 0.12  |
| <b>A2MG_MOUSE Alpha-2-macroglobulin precursor (Alpha-2-M)</b>                  |                     |            |       |       |
| 2739                                                                           | -.AINYLISGYQR.-     | 1297.69000 | 4.16  | 0.46  |
| 3236                                                                           | -.ALLAYAFALAGNK.-   | 1322.75000 | 3.19  | 0.30  |
| 2288                                                                           | -.KTVSWAVTPK.-      | 1116.64000 | 2.60  | 0.24  |
| 3113                                                                           | -.LSPQSIYNLLPGK.-   | 1429.80000 | 3.25  | 0.35  |
| 2999                                                                           | -.VNTNYRPLPFSGQ     | 2346.25000 | 5.71  |       |
| <b>AT2B1 Plasma membrane calcium-transporting ATPase 1 (PMCA1)</b>             |                     |            |       |       |
| 1708                                                                           | -.IRNEKGEIEQER.-    | 1500.78000 | 4.19  | 0.37  |
| 2363                                                                           | -.QVVAVTGDGTNDGP    | 1641.84000 | 4.70  | 0.38  |
| <b>L1CAM_MOUSE Neural cell adhesion molecule L1 precursor (N-CAM L1)</b>       |                     |            |       |       |
| 2050                                                                           | -.EATQITQGPR.-      | 1100.57000 | 3.28  | 0.30  |
| 2092                                                                           | -.VKPTNSMIDR.-      | 1160.61000 | 3.12  | 0.18  |
| <b>AT1A3_HUMAN Sodium/potassium-transporting ATPase alpha-3 chain</b>          |                     |            |       |       |
| 2152                                                                           | -.GGDRVPADLR.-      | 1055.56000 | 3.26  | 0.31  |
| 2513                                                                           | -.LNIPVSQVNPR.-     | 1236.71000 | 2.76  | 0.25  |

The significance of each peptide is determined by cross correlation values (XC), which is essentially a goodness of fit term, and Delta Cn, which is the fractional difference between the XC value and the next highest possible hit XC value. The best hits have high XC and Delta Cn values.

**Table S2**  
**Major Proteins in the 66 kD Band Identified by NLC/MS**

| Reference<br>Scan(s)                                                        | Peptide          | Score       |      |       |
|-----------------------------------------------------------------------------|------------------|-------------|------|-------|
|                                                                             |                  | MH+         | XC   | Delta |
| <b>Mouse protein kinase c lambda (PKCλ)</b>                                 |                  |             |      |       |
| 2064                                                                        | -PCVPERPGMP-     | 1011.21000  | 3.98 | 0.49  |
| 1143                                                                        | -SEGHKLTDYGMC-   | 15196.75000 | 4.28 | 0.56  |
| 2708                                                                        | -SSGEFGLDNFDSQ-  | 1311.56000  | 2.82 | 0.33  |
| <b>Mouse heat shock protein-70 (HSP70)</b>                                  |                  |             |      |       |
| 1617                                                                        | -HWPFFQVVNDGD-   | 1338.66000  | 3.13 | 0.32  |
| 2302                                                                        | -LLLLDVAPLSLG-   | 1426.61000  | 3.72 | 0.38  |
| 2793                                                                        | -WLDSNTLADKE-    | 1929.16000  | 4.11 | 0.54  |
| <b>Mouse paxillin alpha</b>                                                 |                  |             |      |       |
| 2698                                                                        | -KNSSASNTQDG-    | 1321.33000  | 2.96 | 0.27  |
| 1324                                                                        | -GVATVAKGVCGA-   | 1655.32000  | 3.39 | 0.34  |
| <b>Tyrosine kinase src (mouse src)</b>                                      |                  |             |      |       |
| 1628                                                                        | -DYESRTETD-      | 14006.32000 | 2.11 | 0.21  |
| 2469                                                                        | -ERMNYVHRDLR-    | 1711.22000  | 3.27 | 0.32  |
| <b>Mouse calcium/calmodulin-dependent protein kinase II beta (CaMK-IIβ)</b> |                  |             |      |       |
| 2156                                                                        | -PEWDTVTPPEAKNL- | 1302.26000  | 3.11 | 0.36  |
| 2493                                                                        | -EGMDFHRFYFEN-   | 1730.22000  | 2.72 | 0.28  |
| <b>Mouse phosphatase 2B (PP2B)</b>                                          |                  |             |      |       |
| 2033                                                                        | -HLTEYFTFKQECK-  | 1452.53000  | 3.37 | 0.38  |
| 2621                                                                        | -GGRQTLQSATVE-   | 1146.21000  | 3.76 | 0.41  |
| <b>Heat shock protein-70-like heat shock 71 protein (HS71 protein)</b>      |                  |             |      |       |
| 2389                                                                        | -TNTVFDKRLIG-    | 1329.43000  | 2.64 | 0.28  |
| 2390                                                                        | -ADLFRGTLDPV-    | 1569.65000  | 3.65 | 0.36  |
| <b>Kinesin light chain 2</b>                                                |                  |             |      |       |
| 2598                                                                        | -EDEQSPAPSPG-    | 1124.65000  | 2.43 | 0.23  |
| 2184                                                                        | -EDCASRSRKQ-     | 1632.87000  | 3.67 | 0.34  |

The significance of each peptide is determined by cross correlation values (XC), which is essentially a goodness of fit term, and Delta Cn, which is the fractional difference between the XC value and the next highest possible hit XC value. The best hits have high XC and Delta Cn values.
